# Supplementary material for: Genetic Variation Underpinning ADHD Risk in a Caribbean Community
Source: PubMed Central journal article supplement (PMC6721689; doi:10.3390/cells8080907), 2019-08-16
Supplement: cells-08-00907-s001.pdf [file cells-08-00907-s001.pdf]

# Genetic Variation Underpinning ADHD Risk in a Caribbean Community

Pedro J. Puentes-Rozo<sup>1,2,\*</sup>, Johan E. Acosta-López<sup>1</sup>, Martha L. Cervantes-Henríquez<sup>1,3</sup>, Martha L. Martínez-Banfi<sup>1</sup>, Elsy Mejía-Segura<sup>1</sup>, Manuel Sánchez-Rojas<sup>1</sup>, Marco E. Anaya-Romero<sup>4</sup>, Antonio Acosta-Hoyos<sup>4</sup>, Guisselle A. García-Llinás<sup>3</sup>, Claudio A. Mastronardi<sup>5</sup>, David A. Pineda<sup>6,7</sup>, F. Xavier Castellanos<sup>8,9</sup>, Mauricio Arcos-Burgos<sup>10,\*,#</sup>, Jorge I. Vélez<sup>3,\*,#</sup>

<sup>1</sup> Grupo de Neurociencias del Caribe, Unidad de Neurociencias Cognitivas, Universidad Simón Bolívar, Barranquilla, Colombia. ppuentes1@unisimonbolivar.edu.co (P.J.P.R.); jacosta@unisimonbolivar.edu.co (J.E.A.L.); cervantesmh@unisimonbolivar.edu.co (M.L.C.H.); mmartinez108@unisimonbolivar.edu.co (M.L.M.B.); emejia18@unisimonbolivar.edu.co (E.M.S.); sanchezr@unisimonbolivar.edu.co (M.S.R).

<sup>2</sup> Grupo de Neurociencias del Caribe, Universidad del Atlántico, Barranquilla, Colombia.

<sup>3</sup> Universidad del Norte, Barranquilla, Colombia. jvelezv@uninorte.edu.co (J.I.V.); gagarcia@uninorte.edu.co (G.A.G.L)

<sup>4</sup> Grupo de Investigación en Genética, Laboratorio de Genética y Biología Molecular, Universidad Simón Bolívar, Barranquilla, Colombia. manaya6@unisimonbolivar.edu.co (M.E.A.R); aacosta24@unisimonbolivar.edu.co (A.A.H)

<sup>5</sup> INPAC Research Group, Fundación Universitaria Sanitas, Bogotá, Colombia. mastronardi@hotmail.com

<sup>6</sup> Neuroscience Research Group, University of Antioquia, Medellín, Colombia. david.pineda1@udea.edu.co

<sup>7</sup> Neuropsychology and Conduct Research Group, University of San Buenaventura, Medellín, Colombia.

<sup>8</sup> Department of Child and Adolescent Psychiatry, Hassenfeld Children's Hospital at NYU Langone, New York, NY, USA. francisco.castellanos@nyumc.org

<sup>9</sup> Nathan Kline Institute for Psychiatric Research, Orangeburg, NY, USA.

<sup>10</sup> Grupo de Investigación en Psiquiatría (GIPSI), Departamento de Psiquiatría, Instituto de Investigaciones Médicas, Facultad de Medicina, Universidad de Antioquia, Medellín, Colombia. mauricio.arcos@udea.edu.co

\* These authors contributed equally to this work.

# Correspondence: [mauricio.arcos@udea.edu.co](mailto:mauricio.arcos@udea.edu.co) (M.A.B.); [jvelezv@uninorte.edu.co](mailto:jvelezv@uninorte.edu.co) (J.I.V)

## Supplementary Material:

**Table S1.** Single nucleotide polymorphisms (SNPs) genotyped in 386 individuals belonging to 113 nuclear families from Barranquilla, Colombia.

| Marker      | Alleles | Chr | Position    | Closest gene(s)     | QC result | Observations  |
|-------------|---------|-----|-------------|---------------------|-----------|---------------|
| rs143020947 | A/G     | 2   | 143,643,356 | <i>KYNU</i>         | NO PASS   | Monomorphic   |
| rs207462497 | G/T     | 2   | 143,689,722 | <i>KYNU</i>         | NO PASS   | Monomorphic   |
| rs1565902   | C/T     | 4   | 62,091,215  | <i>ADGRL3</i>       | PASS      | -             |
| rs10001410  | A/C     | 4   | 62,156,824  | <i>ADGRL3</i>       | PASS      | -             |
| rs2122642   | G/A     | 4   | 62,380,859  | <i>ADGRL3</i>       | PASS      | -             |
| rs6551660   | C/G     | 4   | 62,390,745  | <i>ADGRL3</i>       | NO PASS   | HW criterion  |
| rs207464763 | A/G     | 4   | 62,416,514  | <i>ADGRL3</i>       | NO PASS   | Monomorphic   |
| rs1510921   | C/T     | 4   | 62,578,187  | <i>ADGRL3</i>       | NO PASS   | HW criterion  |
| rs6551678   | A/G     | 4   | 62,705,646  | <i>ADGRL3</i>       | NO PASS   | HW criterion  |
| rs207464765 | A/T     | 4   | 62,720,720  | <i>ADGRL3</i>       | NO PASS   | Monomorphic   |
| rs748519607 | A/T     | 4   | 63,888,775  | <i>ADGRL3</i>       | NO PASS   | HW criterion  |
| rs28363183  | G/A     | 5   | 1,444,398   | <i>SCL6A3</i>       | NO PASS   | Monomorphic   |
| rs2282794   | A/G     | 5   | 141,961,893 | <i>FGF1</i>         | PASS      | -             |
| rs761010945 | A/C     | 9   | 136,499,907 | <i>DBH</i>          | NO PASS   | Monomorphic   |
| rs569034387 | C/G     | 9   | 136,500,791 | <i>DBH</i>          | NO PASS   | Monomorphic   |
| rs199926239 | A/T     | 9   | 136,512,962 | <i>DBH</i>          | NO PASS   | Monomorphic   |
| rs916457    | C/T     | 11  | 627,014     | <i>DRD4</i>         | PASS      | -             |
| rs1800443   | G/T     | 11  | 629,830     | <i>DRD4</i>         | NO PASS   | HW criterion  |
| rs2236225   | G/A     | 14  | 63,978,598  | <i>MTHFD1</i>       | NO PASS   | Monomorphic   |
| rs11568324  | C/T     | 16  | 54,283,559  | <i>SLC6A2</i>       | NO PASS   | MAF criterion |
| rs371002154 | A/C     | 16  | 55,726,127  | <i>SLC6A2</i>       | NO PASS   | Monomorphic   |
| rs79777590  | C/T     | 17  | 4,298,478   | <i>UBE2G1/SPNS3</i> | NO PASS   | Monomorphic   |
| rs565399294 | A/G     | 17  | 4,395,222   | <i>SPNS3/SPNS2</i>  | NO PASS   | Monomorphic   |
| rs2228130   | C/T     | 17  | 7,345,715   | <i>POLR2A</i>       | NO PASS   | MAF criterion |
| rs6108461   | A/G     | 20  | 10,215,270  | <i>SNAP25</i>       | NO PASS   | HW criterion  |
| rs362990    | A/T     | 20  | 10,224,221  | <i>SNAP25</i>       | PASS      | -             |

<sup>a</sup> UCSC GRCh37/hg19 coordinates. Chr: Chromosome; QC: Quality control; HW: Hardy-Weinberg. Markers highlighted in blue passed quality control filters and were further included for analyses.
